# Supplementary material for: The Rhodanese PspE Converts Thiosulfate to Cellular Sulfane Sulfur in Escherichia coli
Source: MDPI journal article supplement (doi:10.3390/antiox12051127), 2023-05-20
Supplement: s1 [file s1]

Supplementary materials for

**The rhodanese PspE converts thiosulfate to cellular sulfane sulfur in *E. coli***

**Qiaoli Yu<sup>1</sup>, Mingxue Ran<sup>1</sup>, Yuping Xin<sup>1</sup>, Huaiwei Liu<sup>1</sup>, Honglei Liu<sup>1</sup>, Yongzhen Xia<sup>1\*</sup> and**

**Luying Xun<sup>1,2\*</sup>**

<sup>1</sup>State Key Laboratory of Microbial Technology, Shandong University, 72 Binhai Road,

Qingdao 266237, China

<sup>2</sup>School of Molecular Biosciences, Washington State University, Pullman, WA, 991647520,

USA

\* Corresponding authors: L. Xun. Tel: +1-509-335-2787; Email: luying\_xun@vetmed.edu.edu

and Y. Xia. Tel: +86-532-58631572; Email: xiayongzhen2002@sdu.edu.cn.

Supplemental Figures S1-7.

Supplemental Tables S1-2.

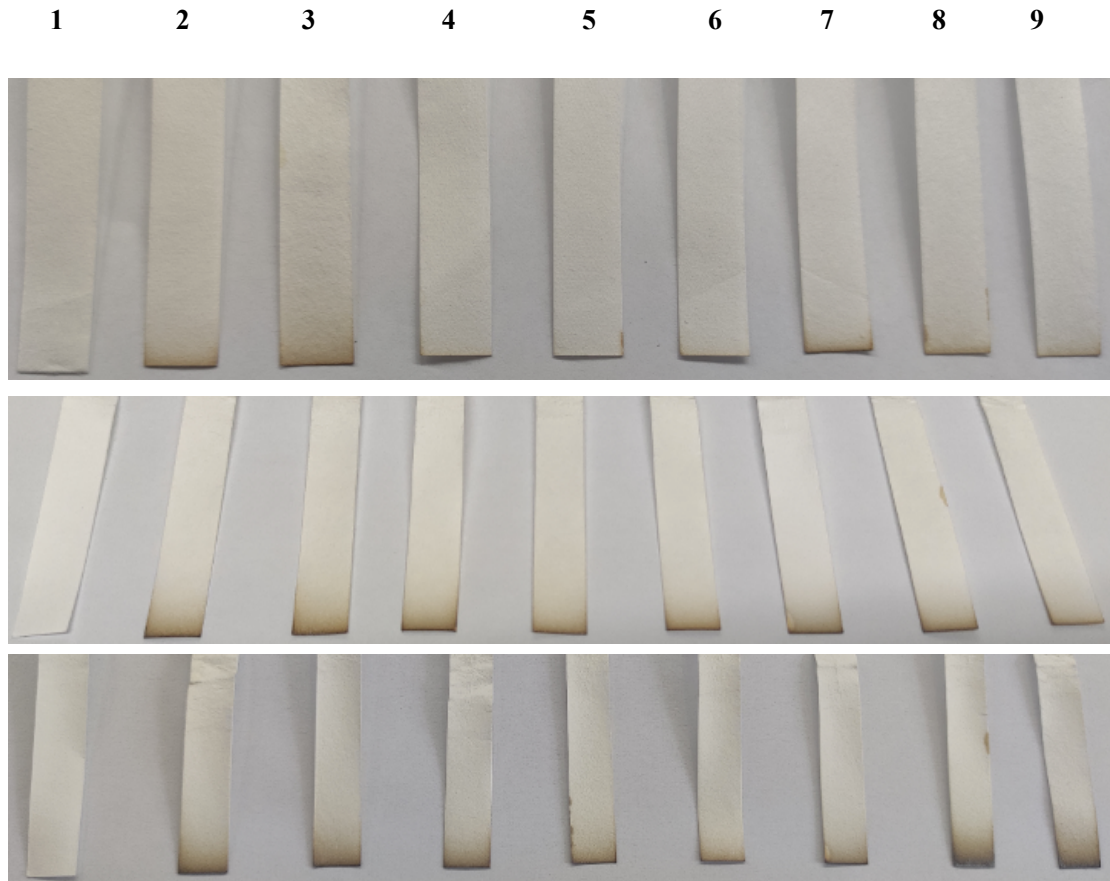

**Supplementary Figure S1. Hydrogen sulfide detection after addition of thiosulfate to *E. coli* strains.** Lane 1, LB + 10 mM thiosulfate; Lane 2, *E. coli* MG1655 + 0 mM thiosulfate; Lane 3, *E. coli* MG1655 + 10 mM thiosulfate; Lanes 4 - 9, *E. coli* mutants + 10 mM thiosulfate: RHOD-5K (lane 4), RHOD-8K (lane 5),  $\Delta$ seA (lane 6),  $\Delta$ pspE (lane 7),  $\Delta$ pspE:: $\Delta$ NS pspE (lane 8),  $\Delta$ pspE::pspE (lane 9). The cells were cultured in LB till OD<sub>600nm</sub> of 1, and then thiosulfate and lead-acetate strips were added. The cultures were at 37°C with shaking at 200 rpm. The strips were taken and photographed at 1, 6, and 20 h.

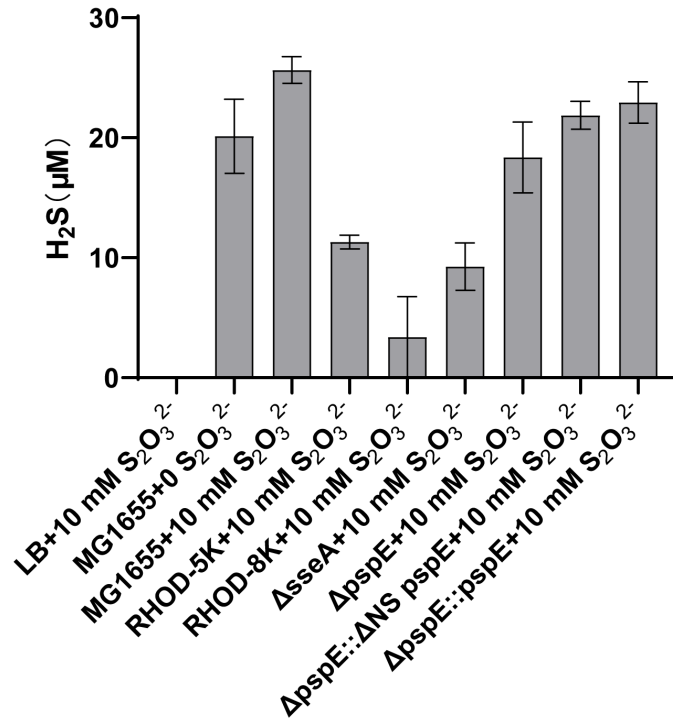

**Supplementary Figure S2. Hydrogen sulfide detection by using HPLC after addition of thiosulfate to *E. coli* strains.** *E. coli* were transferred to fresh LB at initial OD<sub>600</sub> = 0.05, and incubated at 37°C, 200 rpm for 30 min, then added 0.4 mM IPTG to induce PspE expression. When the strains grew to OD<sub>600</sub> of 1, 10 mM thiosulfate was added and incubated at 37°C, 200 rpm for 1 h. One mL bacteria culture of OD<sub>600</sub> = 2 was taken and centrifuged, and the sulfide in the supernatant was derivatized by mBBr and then detected by HPLC.

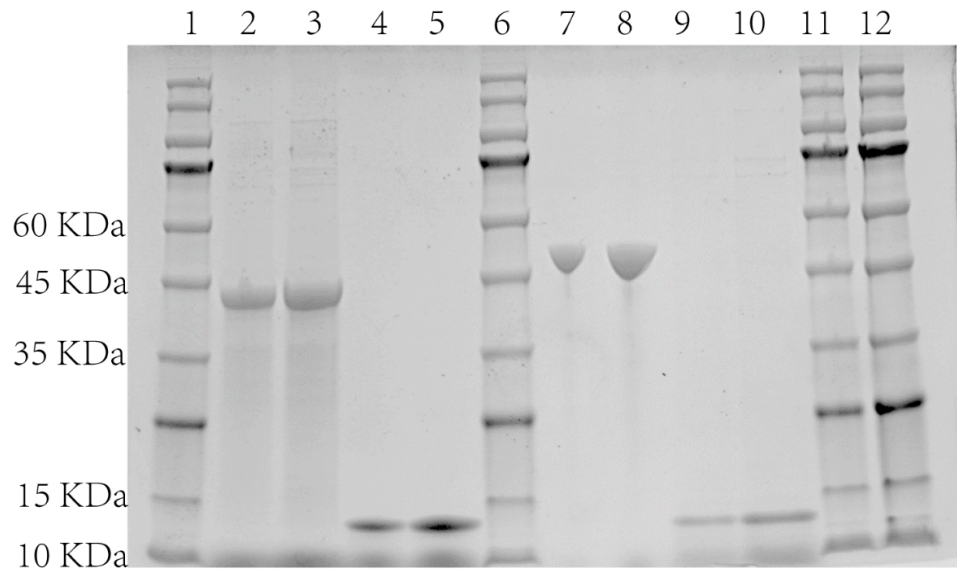

**Supplementary Figure S3. SDS-PAGE analysis of purified RHODs.** The purified YceA (line 2, 3),  $\Delta$ NS-PspE (line 4, 5),  $\Delta$ NS-YnjE (line 7, 8), and GlpE (line 9, 10) were analyzed via SDS-PAGE. The *Blue Plus IV* Protein Marker (10 KDa~180 KDa) was used in lines 1, 6, 11, and 12.

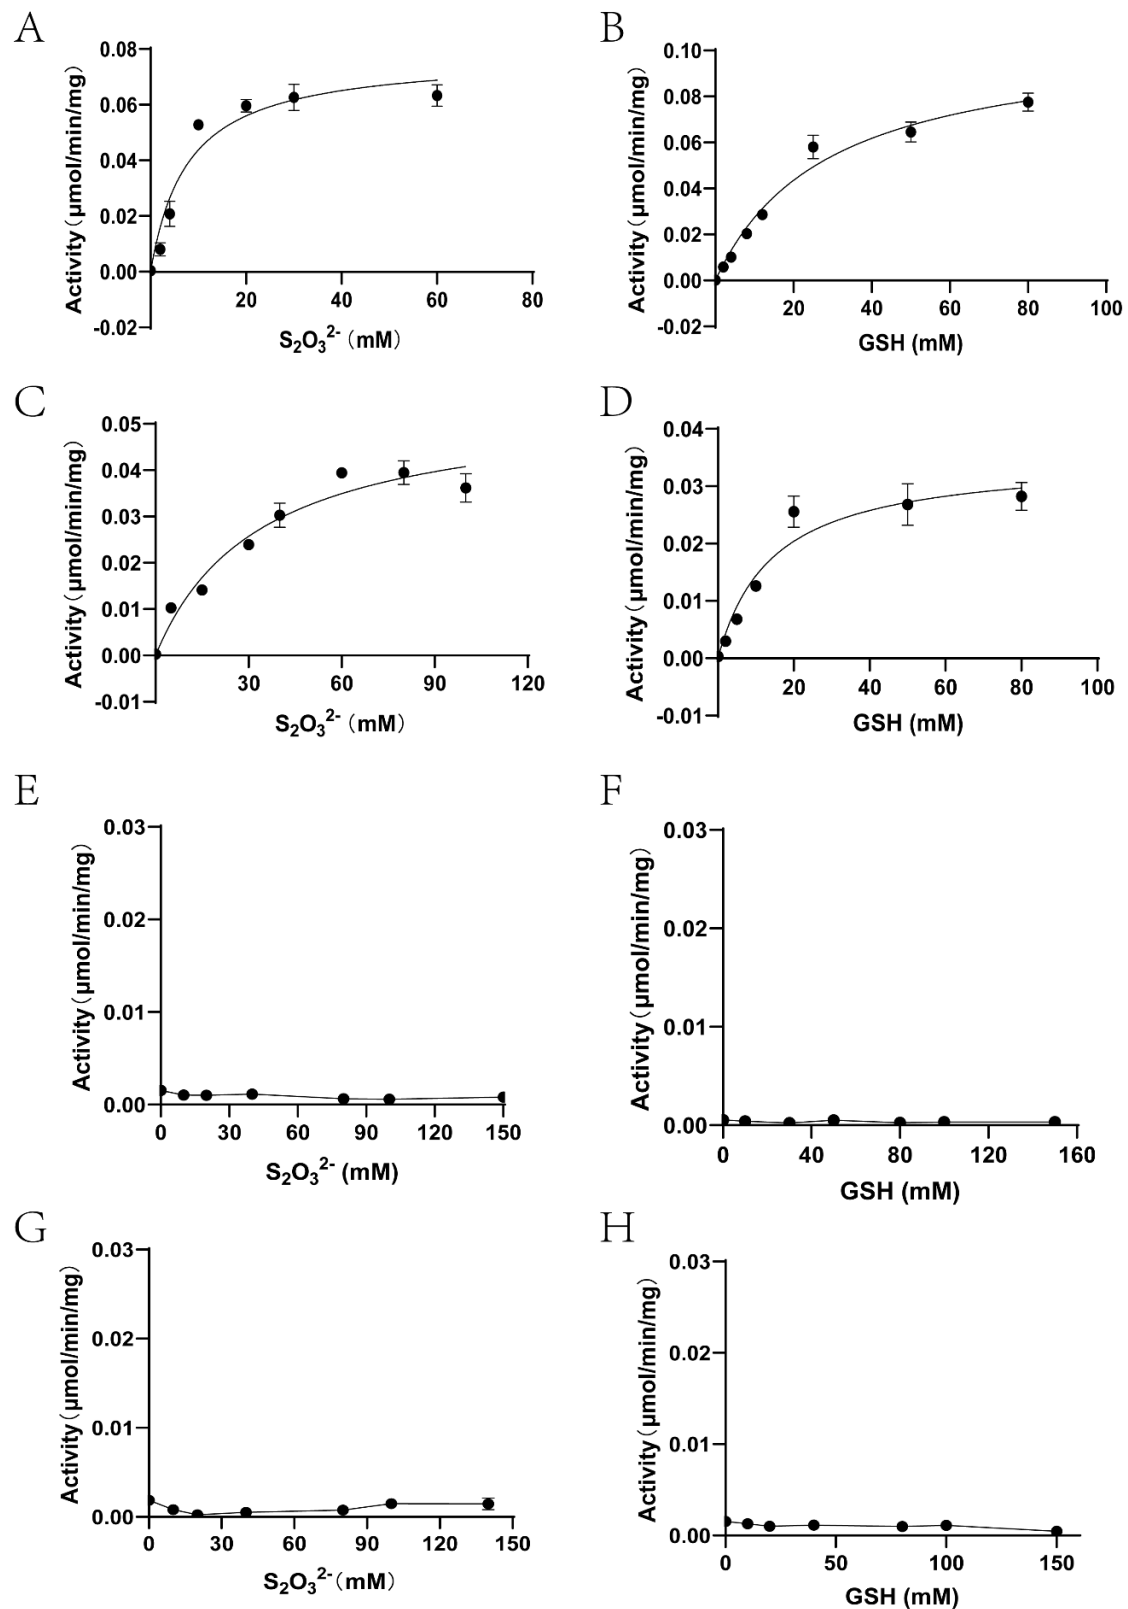

Supplementary Figure S4. Kinetic analysis of RHODs thiosulfate:GSH sulfurtransferase activity. The kinetic parameters of  $\Delta\text{NS-PspE}$  (A,B), GlpE (C,D),  $\Delta\text{NS-YnjE}$  (E,F), and YceA (G,H) were assayed with either fixed GSH or thiosulfate at 100 mM and varying concentrations of the other substrate.  $\Delta\text{NS-PspE}$ , GlpE,  $\Delta\text{NS-YnjE}$ , and YceA in the reaction

mixtures were at 5 µg/mL, 5 µg/mL, 200 µg/mL, and 100 µg/mL. Three parallel experiments were performed to obtain the averages and standard deviations (n = 3). The data were fitted with Michaelis-Menten equation.

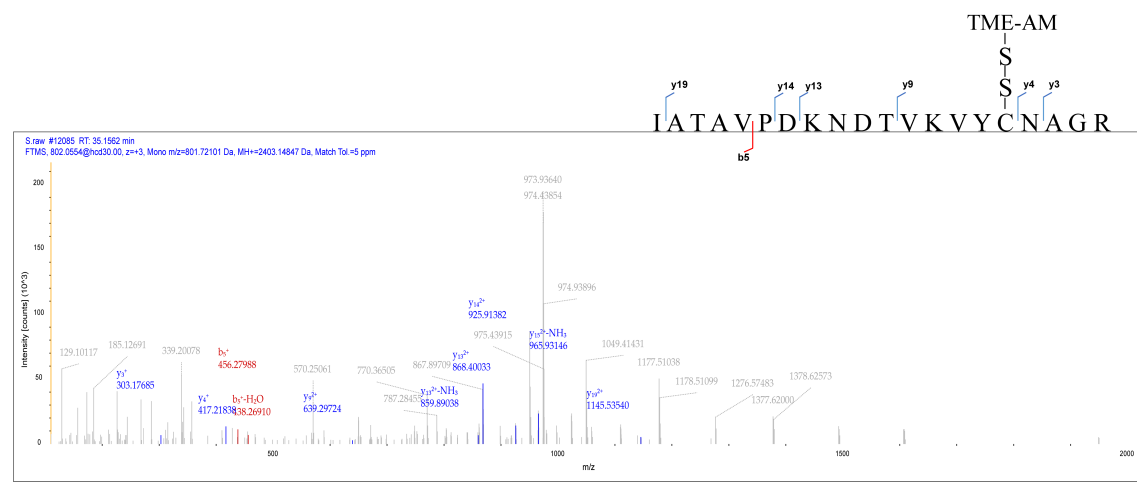

**Supplementary Figure S5. LC-MS/MS analysis of Cys49 modification in thiosulfate reacted ΔNS-PspE.** Purified ΔNS-PspE protein reacted with thiosulfate for 30 min, sample preparation and LC-MS/MS analysis were then performed. Cys49 persulfidation (Cys-SSH) was identified.

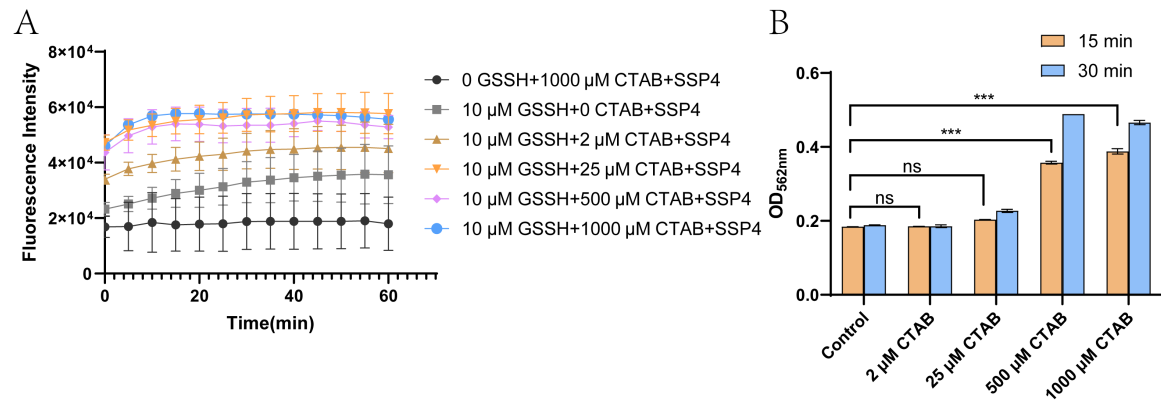

**Supplementary Figure S6. Selection of appropriate CTAB concentration.** CTAB makes cell membrane more permeable to lead out cellular contents. **(A)** Effects of different concentrations of CTAB on SSP4 fluorescence intensity. **(B)** *E. coli* MG1655 wild-type resting cells at OD<sub>600nm</sub> of 2.0 were detected with BCA after incubated with different concentrations of CTAB in room temperature. Three parallel experiments were performed to obtain the averages and standard deviations (n = 3).

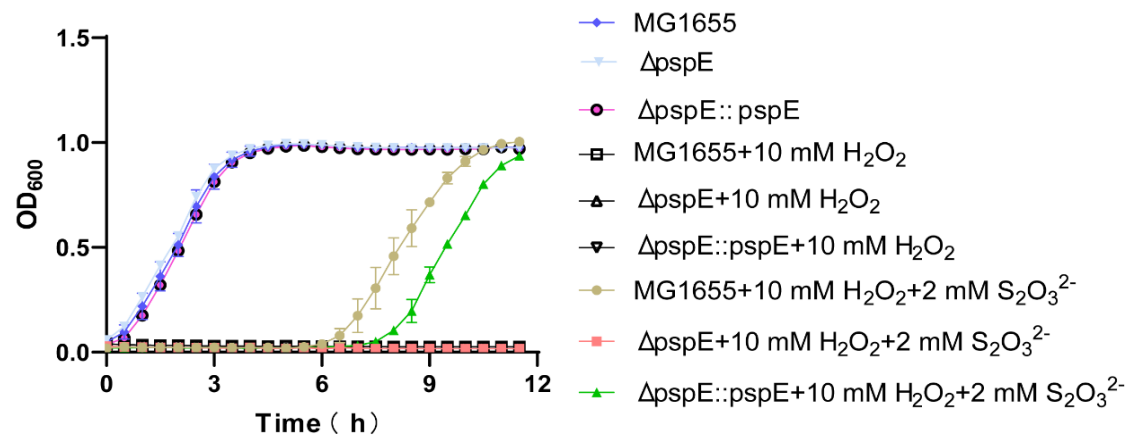

**Supplementary Figure S7. Growth curves of *E. coli* when incubated with 2 mM thiosulfate and hydrogen peroxide ( $\text{H}_2\text{O}_2$ ).** MG1655 wild-type,  $\Delta\text{pspE}$ , and  $\Delta\text{pspE}::\text{pspE}$  were incubated in 400  $\mu\text{L}$  LB medium at the initial  $\text{OD}_{600\text{nm}}$  of 0.05 in 48-well plates. No growth was observed for all strains with 10 mM hydrogen peroxide. With 10 mM hydrogen peroxide and 2 mM thiosulfate, delayed growth was observed. However, no growth was observed for  $\Delta\text{pspE}$  with 10 mM hydrogen peroxide and 2 mM thiosulfate. Three parallel experiments were performed to obtain the averages and standard deviations ( $n = 3$ ).



**Supplementary Table S1. Strains and plasmids used in this study**

| Strain/plasmid                  | Characteristic                                                                                                                                                                                                | Source                  |
|---------------------------------|---------------------------------------------------------------------------------------------------------------------------------------------------------------------------------------------------------------|-------------------------|
| <i>Escherichia coli</i> strains |                                                                                                                                                                                                               |                         |
| DH5a                            | Cloning strain                                                                                                                                                                                                | Invitrogen              |
| BL21(DE3)                       | Protein expression strain                                                                                                                                                                                     | Invitrogen              |
| MG1655                          | Wild type                                                                                                                                                                                                     | Laboratory preservation |
| $\Delta$ pspE                   | MG1655 mutant with <i>pspE</i> deleted                                                                                                                                                                        | Laboratory preservation |
| $\Delta$ ygaP                   | MG1655 mutant with <i>ygaP</i> deleted                                                                                                                                                                        | Laboratory preservation |
| $\Delta$ ynjE                   | MG1655 mutant with <i>ynjE</i> deleted                                                                                                                                                                        | Laboratory preservation |
| $\Delta$ glpE                   | MG1655 mutant with <i>glpE</i> deleted                                                                                                                                                                        | Laboratory preservation |
| $\Delta$ sseA                   | MG1655 mutant with <i>sseA</i> deleted                                                                                                                                                                        | Laboratory preservation |
| RHOD-5K                         | MG1655 mutant with <i>pspE</i> , <i>glpE</i> , <i>ynjE</i> , <i>ygaP</i> and <i>sseA</i> genes deleted                                                                                                        | Laboratory preservation |
| RHOD-8K                         | MG1655 mutant with <i>pspE</i> , <i>glpE</i> , <i>ynjE</i> , <i>ygaP</i> , <i>sseA</i> , <i>yceA</i> , <i>yibN</i> , <i>ybbB</i> genes deleted                                                                | Laboratory preservation |
| <i>Plasmids</i>                 |                                                                                                                                                                                                               |                         |
| pET30a                          | Km <sup>r</sup> , expression vector                                                                                                                                                                           | Invitrogen              |
| pET30-RHODs                     | Km <sup>r</sup> , pET30a containing $\Delta$ NS- <i>pspE</i> , $\Delta$ NS- <i>ynjE</i> , <i>glpE</i> , <i>yceA</i> with C-terminal his-tag                                                                   | This study              |
| pCP20                           | pSC101 ori, temperature sensitive, used for antibiotic resistance gene removing                                                                                                                               | Addgene                 |
| pTKred                          | pSC101 ori, temperature sensitive, used for gene deletion                                                                                                                                                     | Addgene                 |
| pKD4                            | R6K ori, Km <sup>r</sup> and Amp used for gene deletion or template of pKat promoter                                                                                                                          | Addgene                 |
| pBBR1MCS2-Plac-rhods            | Km <sup>r</sup> , pMCS2 vector with $\Delta$ NS- <i>pspE</i> , <i>pspE</i> , <i>glpE</i> , <i>ynjE</i> , <i>ygaP</i> , <i>sseA</i> , <i>yceA</i> , <i>yibN</i> or <i>ybbB</i> gene from <i>E. coli</i> MG1655 | This study              |

**Supplementary Table S2. Primers used in this study**

| Primers         | Sequence (5'-3')                                       | Products | Usage                           |
|-----------------|--------------------------------------------------------|----------|---------------------------------|
| pspE-del-FR     | GAAAGTTATGAATACTCGCTGG                                 | 1964 bp  | For <i>pspE</i> deletion        |
| pspE-del-RV     | CGCTGTGTAATTAATCGTTTCG                                 |          |                                 |
| glpE-del-FR     | CCAGCATCAGCACGGATAAACC                                 | 2102 bp  | For <i>glpE</i> deletion        |
| glpE-del-RV     | CAATAAACACCACCACGCAGGC                                 |          |                                 |
| ynjE-del-FR     | TGAGGGAGCTTTCATCAGGAT                                  | 2020 bp  | For <i>ynjE</i> deletion        |
| ynjE-del-RV     | GGCTTTATTCTTGCTGCACCGG                                 |          |                                 |
| sseA-del-FR     | GCATCTTTTTTACCGCTGTTG                                  | 2007 bp  | For <i>sseA</i> deletion        |
| sseA-del-RV     | AGCAACAAAAAACCGCCTGATT                                 |          |                                 |
| ygaP-del-FR     | AAAGCAATGAGCCACCCTAAAC                                 | 2053 bp  | For <i>ygaP</i> deletion        |
| ygaP-del-RV     | TCAGGGTTGTCTACTAAAGAAAG                                |          |                                 |
| pET-ΔNS-PspE-FR | TTAAGAAGGAGATATACATATGGCTG<br>AACACTGGATCGATGTTTCG     | 301 bp   | For pET30-ΔNS-PspE construction |
| pET-ΔNS-PspE-RV | GTGGTGGTGGTGGTGGTGCTCGAGA<br>CCTTTGACCTTGGCATTGC       |          |                                 |
| pET-ΔNS-YnjE-FR | CTTTAAGAAGGAGATATACATATGGC<br>TGAACCTGGCGAAGCCTCTTAC   | 1284 bp  | For pET30-ΔNS-YnjE construction |
| pET-ΔNS-YnjE-RV | GTGGTGGTGGTGGTGGTGCTCGAGT<br>TTGCTACTGTCCGGGCGC        |          |                                 |
| pET-GlpE-FR     | CTTTAAGAAGGAGATATACATATGGA<br>TCAGTTCGAATGTATTAACGTTGC | 364 bp   | For pET30-GlpE construction     |
| pET-GlpE-RV     | GGTGGTGGTGGTGGTGGTGCTCGAGCGCGCC<br>GTACGCCAC           |          |                                 |
| pET-YceA-FR     | CTTTAAGAAGGAGATATACATATGCC<br>AGTGTTACACAACCGC         | 1095 bp  | For pET30-YceA construction     |
| pET-YceA-RV     | GTGGTGGTGGTGGTGGTGCTCGAGT<br>TCTGTTGGATCAGGAATGCACAG   |          |                                 |

Note: PCR was done with Phanta Max Super-Fidelity DNA Polymerase, anneal temperature ranged from 51 to 59°C, extension was at 72°C, and denaturing temperature was 95°C.
